# Supplementary material for: Synthesis and structure of [Na4(DMSO)15][(I3)3(I)]. Self-assembly of hexacoordinated sodium
Source: Royal Society of Chemistry journal article supplement (doi:10.1039/c1cc11898f), 2011-01-01
Supplement: c1cc11898f.pdf [file c1cc11898f.pdf]

## Synthesis and structure of $[\text{Na}_4(\text{DMSO})_{15}][(\text{I}_3)_3(\text{I})]$ . Self-assembly of hexacoordinated sodium.

Álvaro Duarte-Ruiz<sup>1\*</sup>, Nelson Nuñez-Dallos<sup>1</sup>, Luis Garzón-Tovar<sup>1</sup>, Klaus Wurst<sup>2</sup> Eliseo Avella-Moreno<sup>1</sup> and Fernando Gómez-Baquero<sup>3</sup>

<sup>1</sup>*Departamento de Química, Universidad Nacional de Colombia, Ciudad Universitaria, Bogotá Kr 30 No 45-03, Colombia* <sup>2</sup>*Institute of General, Inorganic and Theoretical Chemistry, University of Innsbruck, A-6020 Innsbruck, Austria* <sup>3</sup>*College of Nanoscale Science and Engineering, University at Albany SUNY*

### Electronic Supplementary Information (ESI) for Chemical Communications

**Materials and Methods.** The reagents, dimethyl sulfoxide (DMSO, 99.9%, Carlo Erba), iodomethane (98%, stabilized with silver, Merck) and sodium hydroxide ( $\geq 97\%$ , pellets, Merck), were used without further purification. <sup>1</sup>H NMR and <sup>13</sup>C NMR spectra were acquired at 25°C on a Bruker Avance 400 MHz spectrometer, using the solvent residual signal as the reference for chemical shifts. FT-IR spectra were obtained using a Perkin-Elmer, Paragon 500, Serial 1000 (4000 - 400 cm<sup>-1</sup>) using KBr disks. Thermogravimetric analysis (TG) and differential scanning calorimetry (DSC) were performed on a Rheometrics Scientific STA instrument in a nitrogen atmosphere with a continuous flow of 40 ml/min +/- 2 ml/min and a heating rate of 2 K/min, from 25°C to 400°C.

**Synthesis of  $[\text{Na}_4(\text{DMSO})_{15}][(\text{I})(\text{I}_3)_3]$  (**1**).** NaOH powder (0.170 g, 4.24 mmol) was added to a DMSO (11.010 g, 140.91 mmol) and distilled water (0.130 g, 7.20 mmol) solution. The resulting mixture was ultrasonicated for 30 min, CH<sub>3</sub>I (3.420 g, 24.09 mmol) was added, and ultrasonication was continued for 1.5 h. The obtained yellow solution was kept at 20°C for 6 d, with continuous agitation. The color of the solution changed from yellow to red, and a white precipitate formed. The precipitate was filtered, washed with ethanol and identified as  $[(\text{CH}_3)_3\text{SO}]\text{I}$  (**2**). The filtrate was, refrigerated at 4°C for 8 d, where green crystals with a metallic luster formed for **1**. The crystals of **1** were filtered and dried in a vacuum. Compound **1** is hygroscopic, soluble in water, methanol, ethanol, DMSO and acetonitrile, partially soluble in dichloromethane and insoluble in toluene. The yield obtained was 0.762 g, 28%. <sup>1</sup>H NMR (DMSO-*d*<sub>6</sub>):  $\delta$  2.54(s, 6H). <sup>13</sup>C NMR (DMSO-*d*<sub>6</sub>):  $\delta$  40.34 (CH<sub>3</sub>). <sup>1</sup>H NMR (CDCl<sub>3</sub>):  $\delta$  2.63 (s, 6H). <sup>13</sup>C NMR (CDCl<sub>3</sub>):  $\delta$  40.99 (CH<sub>3</sub>). <sup>1</sup>H NMR (D<sub>2</sub>O):  $\delta$  2.80 (s, 6H). <sup>13</sup>C NMR (D<sub>2</sub>O):  $\delta$  39.04 (CH<sub>3</sub>). IR (KBr, cm<sup>-1</sup>): 2986 (m), 2906 (m),  $\nu(\text{C-H})$ ; 1436 (s), 1403 (m), 1313 (m),  $\delta(\text{C-H})$ ; 1017 (vs),  $\nu(\text{S=O})$ ; 952 (s), 934(m), 897 (w),  $\delta(\text{C-H})$ ; 704 (s), 674 (m),  $\nu(\text{C-S})$ .

Compound **2** was identified as trimethyl sulfoxonium iodide<sup>14</sup> (0.694 g, 13%). <sup>1</sup>H NMR (DMSO-*d*<sub>6</sub>):  $\delta$  3.87 (s, 9H). <sup>13</sup>C NMR (DMSO-*d*<sub>6</sub>):  $\delta$  39.02 (CH<sub>3</sub>). IR (KBr, cm<sup>-1</sup>): 2962 (vs), 2880 (s),  $\nu(\text{C-H})$ ; 1402 (s), 1339 (w), 1312 (m),  $\delta(\text{C-H})$ ; 1229 (vs),  $\nu(\text{S=O})$ ; 1039 (vs), 952(s),  $\delta(\text{C-H})$ ; 757 (m),  $\nu(\text{C-S})$ .

Additional experiments were conducted under similar conditions as the synthesis of **1**. We used LiOH, KOH, RbOH and CsOH instead of NaOH, but the reactions did not yield the complexes containing the cations Li<sup>+</sup>, K<sup>+</sup>, Rb<sup>+</sup> or Cs<sup>+</sup> ions. Subsequently, NaI (4.24 mmol) was added to the final solutions of each experiment, and the mixture was kept refrigerated at 4°C for 3 d. Crystals of **1** were formed in all solutions.

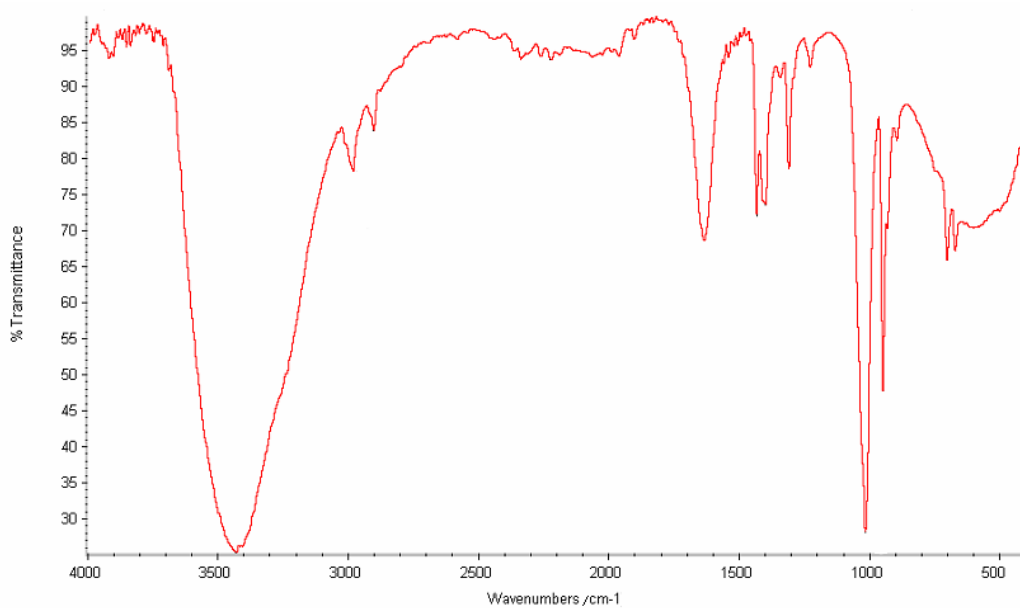

**Figure SI.1** IR spectrum of **1**.

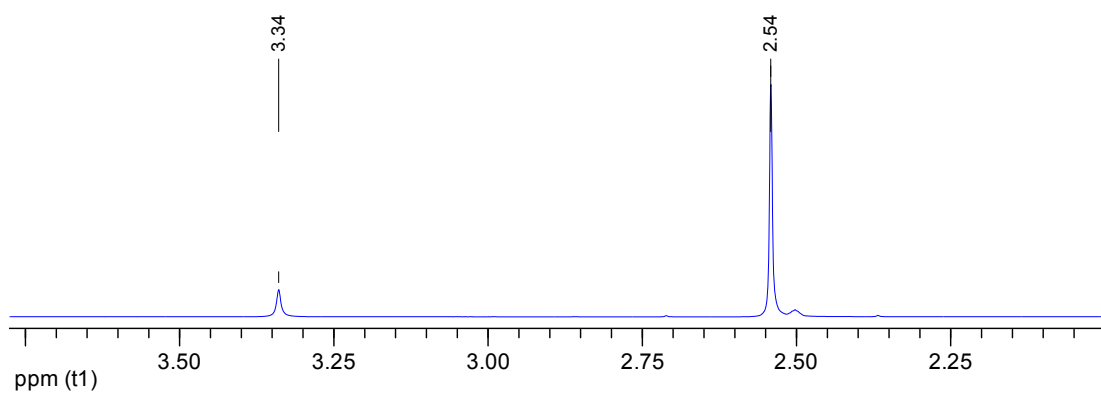

**Figure SI.2** <sup>1</sup>H NMR (DMSO-*d*<sub>6</sub>) spectrum of **1**.

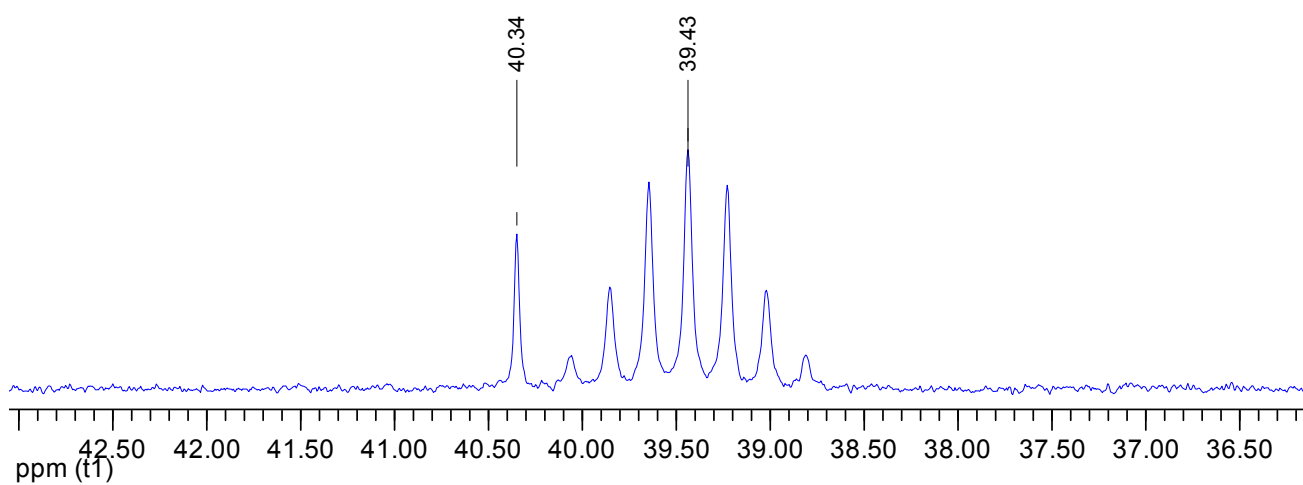

**Figure SI.3** <sup>13</sup>C NMR (DMSO-*d*<sub>6</sub>) spectrum of **1**.

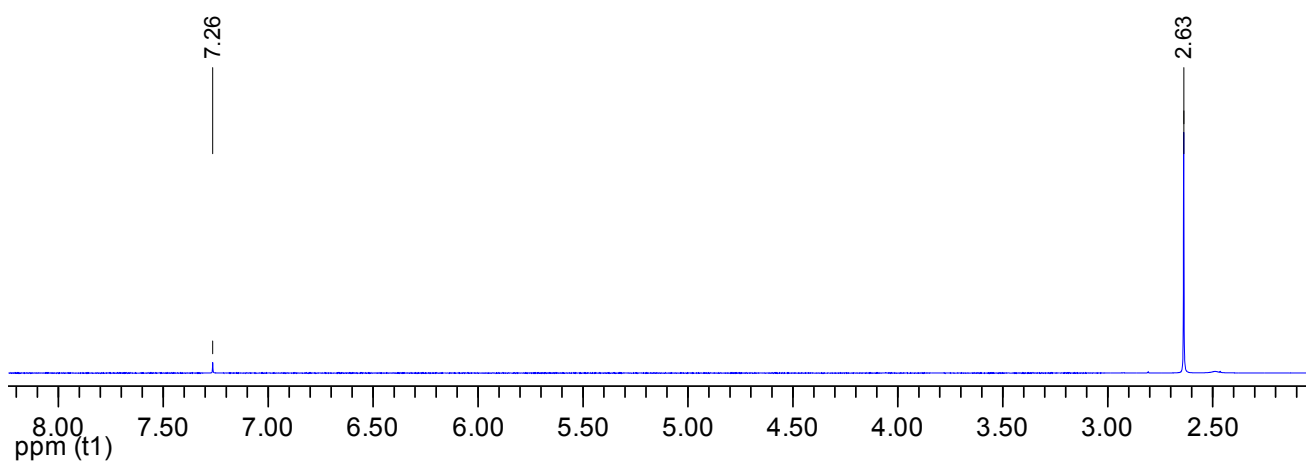

Figure SI.4  $^1\text{H}$  NMR ( $\text{CDCl}_3$ ) spectrum of **1**.

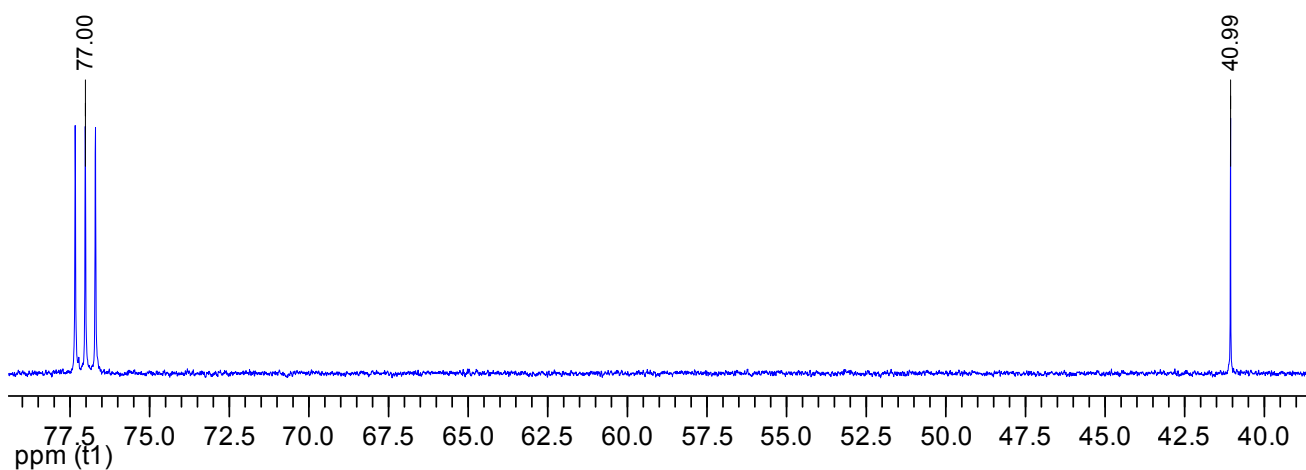

Figure SI.5  $^{13}\text{C}$  NMR ( $\text{CDCl}_3$ ) spectrum of **1**.

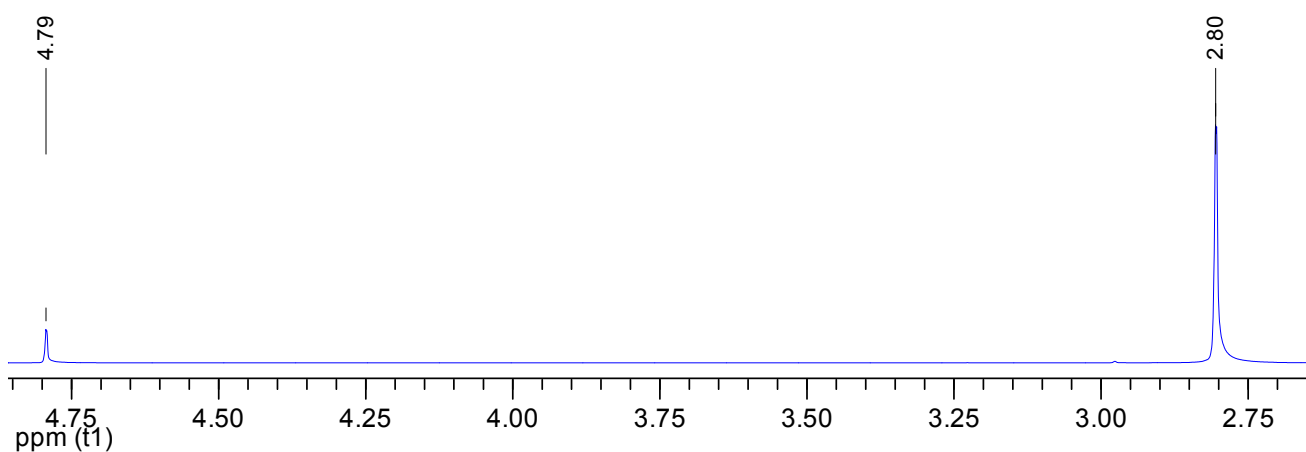

Figure SI.6  $^1\text{H}$  NMR ( $\text{D}_2\text{O}$ ) spectrum of **1**.

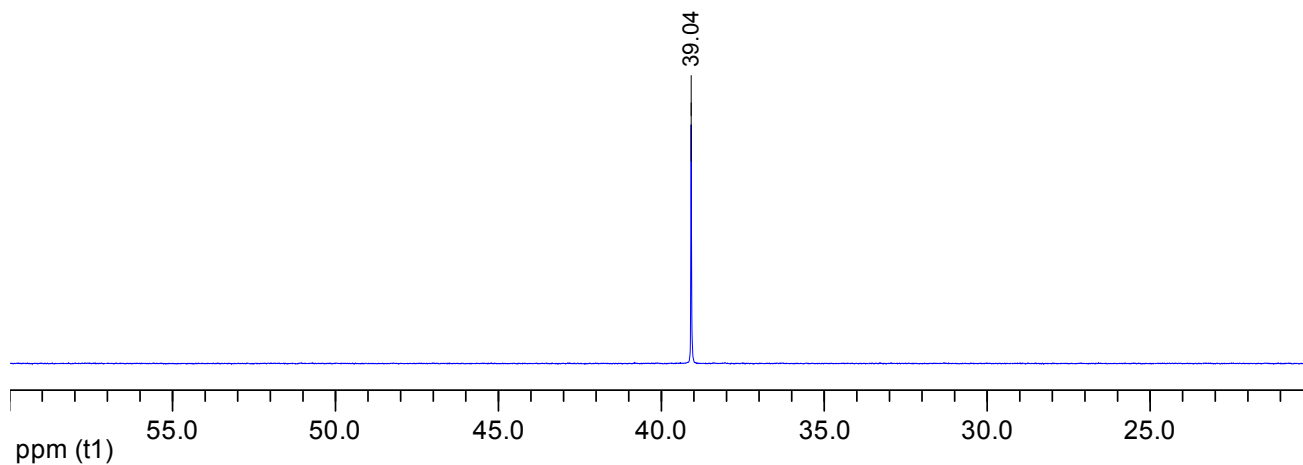

*Figure SI.7*  $^{13}\text{C}$  NMR ( $\text{D}_2\text{O}$ ) spectrum of **1**.

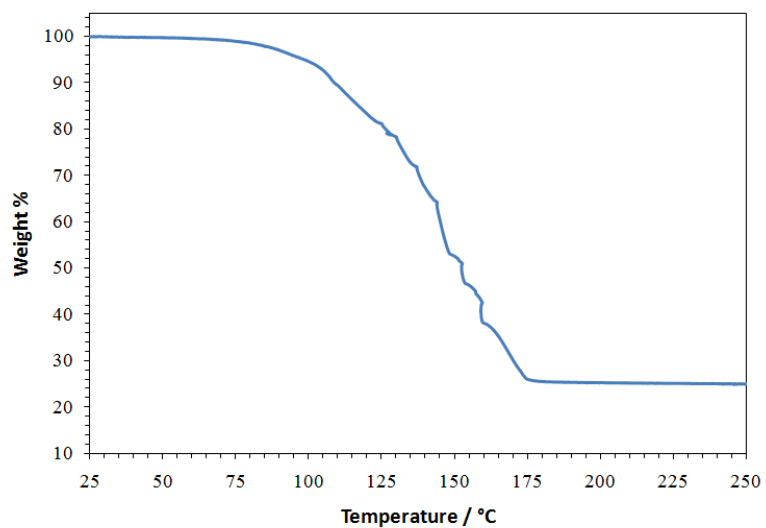

*Figure SI.8* Thermogravimetric analyses of **1**.

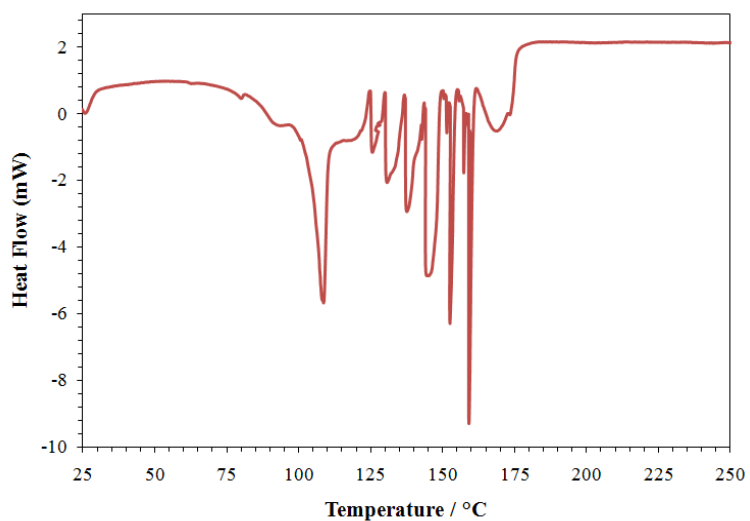

*Figure SI.9* Differential scanning calorimetry (DSC) image of **1**.

**X-ray Measurement and Structure Determination of 1:** Data collection was performed on a Nonius Kappa CCD equipped with graphite-monochromatized Mo-K $\alpha$ -radiation ( $\lambda=0.71073$  Å) and a nominal crystal to area detector distance of 36 mm. Intensities were integrated using DENZO and scaled with SCALEPACK<sup>5</sup>. Several scans in  $\phi$  and  $\omega$  directions were taken to increase the number of redundant reflections, which were averaged in the refinement cycles. This procedure replaces, in approximation, an empirical absorption correction. The structures were solved with direct method SHELXS86 and refined against F<sup>2</sup> SHELX97<sup>6</sup>. All non-hydrogen atoms were refined with anisotropic displacement parameters, except O(3), O(4) and O(5), which were split positions for a disordered oxygen atom with occupations of 0.7, 0.15 and 0.15, respectively. Hydrogen atoms were calculated and refined using a riding model. The Na(2) and Na(3) positions show occupation disorders with occupation factors of 0.2833 for Na(2) and 0.0500 for Na(3). Further information about these disorders is included in the cif-file.

**Table 1.** Crystal data and structure refinement for **1**.

|                                   |                                                                                                                            |
|-----------------------------------|----------------------------------------------------------------------------------------------------------------------------|
| Empirical formula                 | C30 H90 I10 Na4 O15 S15                                                                                                    |
| Formula weight                    | 2532.88                                                                                                                    |
| Temperature                       | 233(2) K                                                                                                                   |
| Wavelength                        | 0.71073 Å                                                                                                                  |
| Crystal system                    | Hexagonal                                                                                                                  |
| Space group                       | P6 <sub>3</sub> /m (no. 176)                                                                                               |
| Unit cell dimensions              | a = 12.0292(4) Å $\alpha = 90^\circ$ .<br>b = 12.0292(3) Å $\beta = 90^\circ$ .<br>c = 32.9777(7) Å $\gamma = 120^\circ$ . |
| Volume                            | 4132.61(19) Å <sup>3</sup>                                                                                                 |
| Z                                 | 2                                                                                                                          |
| Density (calculated)              | 2.035 Mg/m <sup>3</sup>                                                                                                    |
| Absorption coefficient            | 4.193 mm <sup>-1</sup>                                                                                                     |
| F(000)                            | 2408                                                                                                                       |
| Crystal size                      | 0.35 x 0.15 x 0.08 mm <sup>3</sup>                                                                                         |
| Theta range for data collection   | 1.95 to 26.00°.                                                                                                            |
| Index ranges                      | -12 ≤ h ≤ 14, -14 ≤ k ≤ 13, -40 ≤ l ≤ 40                                                                                   |
| Reflections collected             | 16891                                                                                                                      |
| Independent reflections           | 2729 [R(int) = 0.0499]                                                                                                     |
| Reflections [I > 2σ(I)]           | 1915                                                                                                                       |
| Completeness to theta = 26.00°    | 98.4 %                                                                                                                     |
| Absorption correction             | None                                                                                                                       |
| Refinement method                 | Full-matrix least-squares on F <sup>2</sup>                                                                                |
| Data / restraints / parameters    | 2729 / 0 / 121                                                                                                             |
| Goodness-of-fit on F <sup>2</sup> | 1.081                                                                                                                      |
| Final R indices [I > 2σ(I)]       | R1 = 0.0352, wR2 = 0.0833                                                                                                  |
| R indices (all data)              | R1 = 0.0548, wR2 = 0.0902                                                                                                  |
| Largest diff. peak and hole       | 0.659 and -0.622 e.Å <sup>-3</sup>                                                                                         |

**Table 2.** Atomic coordinates ( $\times 10^4$ ) and equivalent isotropic displacement parameters ( $\text{\AA}^2 \times 10^3$ ) for **1**.  $U(\text{eq})$  is defined as one third of the trace for the orthogonalized  $U^{ij}$  tensor.

|       | x        | y        | z        | U(eq) |
|-------|----------|----------|----------|-------|
| I(1)  | 3333     | 6667     | 2500     | 49(1) |
| I(2)  | 3333     | 6667     | 1407(1)  | 44(1) |
| I(3)  | 3333     | 6667     | 532(1)   | 43(1) |
| I(4)  | 3333     | 6667     | -409(1)  | 49(1) |
| I(5)  | 3333     | 6667     | -1605(1) | 46(1) |
| I(6)  | 3333     | 6667     | -2500    | 40(1) |
| Na(1) | 0        | 10000    | 2001(1)  | 32(1) |
| Na(2) | 0        | 10000    | 1006(1)  | 32(1) |
| Na(3) | 0        | 10000    | 0        | 45(3) |
| S(1)  | 2783(1)  | 10581(1) | 2500     | 34(1) |
| S(2)  | 572(1)   | 7808(1)  | 1503(1)  | 36(1) |
| S(3)  | 2699(1)  | 10472(1) | 542(1)   | 47(1) |
| O(1)  | 1342(3)  | 9677(3)  | 2500     | 39(1) |
| O(2)  | -364(3)  | 8297(3)  | 1531(1)  | 46(1) |
| O(3)  | 1327(4)  | 9396(5)  | 654(1)   | 47(1) |
| O(4)  | 1313(18) | 9626(18) | 542(7)   | 24(4) |
| O(5)  | 1330(20) | 9430(20) | 371(6)   | 55(6) |
| C(1)  | 3395(4)  | 10079(4) | 2094(1)  | 49(1) |
| C(2)  | 222(5)   | 6741(5)  | 1917(1)  | 53(1) |
| C(3)  | 13(4)    | 6655(4)  | 1106(1)  | 50(1) |
| C(4)  | 3598(5)  | 10181(5) | 904(1)   | 66(1) |
| C(5)  | 3233(5)  | 10033(5) | 106(1)   | 66(2) |

**Table 3.** Bond lengths [Å] and angles [°] for **1**.

---

|               |           |
|---------------|-----------|
| I(2)-I(3)     | 2.8842(7) |
| I(3)-I(4)     | 3.1037(6) |
| I(5)-I(6)     | 2.9526(4) |
| I(6)-I(5)#1   | 2.9526(4) |
| Na(1)-O(2)#2  | 2.427(3)  |
| Na(1)-O(2)    | 2.427(3)  |
| Na(1)-O(2)#3  | 2.427(3)  |
| Na(1)-O(1)#3  | 2.469(3)  |
| Na(1)-O(1)    | 2.469(3)  |
| Na(1)-O(1)#2  | 2.469(3)  |
| Na(1)-Na(2)   | 3.281(3)  |
| Na(1)-Na(1)#4 | 3.294(4)  |
| Na(2)-O(3)#2  | 2.363(5)  |
| Na(2)-O(3)#3  | 2.363(5)  |
| Na(2)-O(3)    | 2.363(5)  |
| Na(2)-O(4)#2  | 2.40(2)   |
| Na(2)-O(4)    | 2.40(2)   |
| Na(2)-O(4)#3  | 2.40(2)   |
| Na(2)-O(2)#3  | 2.549(3)  |
| Na(2)-O(2)#2  | 2.549(3)  |
| Na(2)-O(2)    | 2.549(3)  |
| Na(2)-O(5)#2  | 2.92(2)   |
| Na(2)-O(5)    | 2.92(2)   |
| Na(2)-O(5)#3  | 2.92(2)   |
| Na(3)-O(5)#3  | 2.37(2)   |
| Na(3)-O(5)#2  | 2.37(2)   |
| Na(3)-O(5)#5  | 2.37(2)   |
| Na(3)-O(5)#6  | 2.37(2)   |
| Na(3)-O(5)    | 2.37(2)   |
| Na(3)-O(5)#7  | 2.37(2)   |
| Na(3)-O(4)#6  | 2.57(2)   |
| Na(3)-O(4)#5  | 2.57(2)   |
| Na(3)-O(4)#7  | 2.57(2)   |
| Na(3)-O(4)#3  | 2.57(2)   |
| Na(3)-O(4)    | 2.57(2)   |
| Na(3)-O(4)#2  | 2.57(2)   |
| S(1)-O(1)     | 1.517(4)  |

|              |           |
|--------------|-----------|
| S(1)-C(1)    | 1.773(4)  |
| S(1)-C(1)#4  | 1.773(4)  |
| S(2)-O(2)    | 1.511(3)  |
| S(2)-C(2)    | 1.774(4)  |
| S(2)-C(3)    | 1.776(4)  |
| S(3)-O(4)    | 1.456(19) |
| S(3)-O(3)    | 1.549(5)  |
| S(3)-O(5)    | 1.60(2)   |
| S(3)-C(5)    | 1.758(5)  |
| S(3)-C(4)    | 1.761(5)  |
| O(1)-Na(1)#4 | 2.469(3)  |
| O(3)-O(5)    | 0.93(2)   |
| O(4)-O(5)    | 0.62(2)   |

|                      |            |
|----------------------|------------|
| I(2)-I(3)-I(4)       | 180.0      |
| I(5)#1-I(6)-I(5)     | 180.0      |
| O(2)#2-Na(1)-O(2)    | 83.67(11)  |
| O(2)#2-Na(1)-O(2)#3  | 83.67(11)  |
| O(2)-Na(1)-O(2)#3    | 83.67(11)  |
| O(2)#2-Na(1)-O(1)#3  | 97.39(9)   |
| O(2)-Na(1)-O(1)#3    | 177.62(10) |
| O(2)#3-Na(1)-O(1)#3  | 98.55(9)   |
| O(2)#2-Na(1)-O(1)    | 177.62(10) |
| O(2)-Na(1)-O(1)      | 98.55(9)   |
| O(2)#3-Na(1)-O(1)    | 97.39(9)   |
| O(1)#3-Na(1)-O(1)    | 80.36(9)   |
| O(2)#2-Na(1)-O(1)#2  | 98.55(9)   |
| O(2)-Na(1)-O(1)#2    | 97.39(9)   |
| O(2)#3-Na(1)-O(1)#2  | 177.62(10) |
| O(1)#3-Na(1)-O(1)#2  | 80.36(9)   |
| O(1)-Na(1)-O(1)#2    | 80.36(9)   |
| O(2)#2-Na(1)-Na(2)   | 50.37(7)   |
| O(2)-Na(1)-Na(2)     | 50.37(7)   |
| O(2)#3-Na(1)-Na(2)   | 50.37(7)   |
| O(1)#3-Na(1)-Na(2)   | 131.84(6)  |
| O(1)-Na(1)-Na(2)     | 131.84(6)  |
| O(1)#2-Na(1)-Na(2)   | 131.84(6)  |
| O(2)#2-Na(1)-Na(1)#4 | 129.63(7)  |
| O(2)-Na(1)-Na(1)#4   | 129.63(7)  |



|                      |            |
|----------------------|------------|
| O(2)#3-Na(1)-Na(1)#4 | 129.63(7)  |
| O(1)#3-Na(1)-Na(1)#4 | 48.16(6)   |
| O(1)-Na(1)-Na(1)#4   | 48.16(6)   |
| O(1)#2-Na(1)-Na(1)#4 | 48.16(6)   |
| Na(2)-Na(1)-Na(1)#4  | 180.0      |
| O(3)#2-Na(2)-O(3)#3  | 97.93(16)  |
| O(3)#2-Na(2)-O(3)    | 97.93(16)  |
| O(3)#3-Na(2)-O(3)    | 97.93(16)  |
| O(3)#2-Na(2)-O(4)#2  | 11.2(5)    |
| O(3)#3-Na(2)-O(4)#2  | 94.4(5)    |
| O(3)-Na(2)-O(4)#2    | 87.9(5)    |
| O(3)#2-Na(2)-O(4)    | 94.4(5)    |
| O(3)#3-Na(2)-O(4)    | 87.9(5)    |
| O(3)-Na(2)-O(4)      | 11.2(5)    |
| O(4)#2-Na(2)-O(4)    | 83.6(8)    |
| O(3)#2-Na(2)-O(4)#3  | 87.9(5)    |
| O(3)#3-Na(2)-O(4)#3  | 11.2(5)    |
| O(3)-Na(2)-O(4)#3    | 94.4(5)    |
| O(4)#2-Na(2)-O(4)#3  | 83.6(8)    |
| O(4)-Na(2)-O(4)#3    | 83.6(8)    |
| O(3)#2-Na(2)-O(2)#3  | 165.73(15) |
| O(3)#3-Na(2)-O(2)#3  | 87.56(13)  |
| O(3)-Na(2)-O(2)#3    | 94.32(13)  |
| O(4)#2-Na(2)-O(2)#3  | 176.8(5)   |
| O(4)-Na(2)-O(2)#3    | 99.0(5)    |
| O(4)#3-Na(2)-O(2)#3  | 98.5(5)    |
| O(3)#2-Na(2)-O(2)#2  | 87.56(13)  |
| O(3)#3-Na(2)-O(2)#2  | 94.32(13)  |
| O(3)-Na(2)-O(2)#2    | 165.73(15) |
| O(4)#2-Na(2)-O(2)#2  | 98.5(5)    |
| O(4)-Na(2)-O(2)#2    | 176.8(5)   |
| O(4)#3-Na(2)-O(2)#2  | 99.0(5)    |
| O(2)#3-Na(2)-O(2)#2  | 78.86(10)  |
| O(3)#2-Na(2)-O(2)    | 94.32(13)  |
| O(3)#3-Na(2)-O(2)    | 165.73(15) |
| O(3)-Na(2)-O(2)      | 87.56(13)  |
| O(4)#2-Na(2)-O(2)    | 99.0(5)    |
| O(4)-Na(2)-O(2)      | 98.5(5)    |
| O(4)#3-Na(2)-O(2)    | 176.8(5)   |

|                     |           |
|---------------------|-----------|
| O(2)#3-Na(2)-O(2)   | 78.86(10) |
| O(2)#2-Na(2)-O(2)   | 78.86(10) |
| O(3)#2-Na(2)-O(5)#2 | 16.5(4)   |
| O(3)#3-Na(2)-O(5)#2 | 87.5(4)   |
| O(3)-Na(2)-O(5)#2   | 86.7(4)   |
| O(4)#2-Na(2)-O(5)#2 | 7.2(7)    |
| O(4)-Na(2)-O(5)#2   | 81.2(6)   |
| O(4)#3-Na(2)-O(5)#2 | 76.6(7)   |
| O(2)#3-Na(2)-O(5)#2 | 175.1(4)  |
| O(2)#2-Na(2)-O(5)#2 | 101.1(4)  |
| O(2)-Na(2)-O(5)#2   | 106.0(4)  |
| O(3)#2-Na(2)-O(5)   | 87.5(4)   |
| O(3)#3-Na(2)-O(5)   | 86.7(4)   |
| O(3)-Na(2)-O(5)     | 16.5(4)   |
| O(4)#2-Na(2)-O(5)   | 76.6(7)   |
| O(4)-Na(2)-O(5)     | 7.2(7)    |
| O(4)#3-Na(2)-O(5)   | 81.2(6)   |
| O(2)#3-Na(2)-O(5)   | 106.0(4)  |
| O(2)#2-Na(2)-O(5)   | 175.1(4)  |
| O(2)-Na(2)-O(5)     | 101.1(4)  |
| O(5)#2-Na(2)-O(5)   | 74.1(6)   |
| O(3)#2-Na(2)-O(5)#3 | 86.7(4)   |
| O(3)#3-Na(2)-O(5)#3 | 16.5(4)   |
| O(3)-Na(2)-O(5)#3   | 87.5(4)   |
| O(4)#2-Na(2)-O(5)#3 | 81.2(6)   |
| O(4)-Na(2)-O(5)#3   | 76.6(7)   |
| O(4)#3-Na(2)-O(5)#3 | 7.2(7)    |
| O(2)#3-Na(2)-O(5)#3 | 101.1(4)  |
| O(2)#2-Na(2)-O(5)#3 | 106.0(4)  |
| O(2)-Na(2)-O(5)#3   | 175.1(4)  |
| O(5)#2-Na(2)-O(5)#3 | 74.1(6)   |
| O(5)-Na(2)-O(5)#3   | 74.1(6)   |
| O(5)#3-Na(3)-O(5)#2 | 95.8(7)   |
| O(5)#3-Na(3)-O(5)#5 | 180.0(9)  |
| O(5)#2-Na(3)-O(5)#5 | 84.2(7)   |
| O(5)#3-Na(3)-O(5)#6 | 84.2(7)   |
| O(5)#2-Na(3)-O(5)#6 | 84.2(7)   |
| O(5)#5-Na(3)-O(5)#6 | 95.8(7)   |
| O(5)#3-Na(3)-O(5)   | 95.8(7)   |

|                     |          |
|---------------------|----------|
| O(5)#2-Na(3)-O(5)   | 95.8(7)  |
| O(5)#5-Na(3)-O(5)   | 84.2(7)  |
| O(5)#6-Na(3)-O(5)   | 180.0(9) |
| O(5)#3-Na(3)-O(5)#7 | 84.2(7)  |
| O(5)#2-Na(3)-O(5)#7 | 180.0(9) |
| O(5)#5-Na(3)-O(5)#7 | 95.8(7)  |
| O(5)#6-Na(3)-O(5)#7 | 95.8(7)  |
| O(5)-Na(3)-O(5)#7   | 84.2(7)  |
| O(5)#3-Na(3)-O(4)#6 | 95.6(7)  |
| O(5)#2-Na(3)-O(4)#6 | 90.4(8)  |
| O(5)#5-Na(3)-O(4)#6 | 84.4(7)  |
| O(5)#6-Na(3)-O(4)#6 | 13.5(6)  |
| O(5)-Na(3)-O(4)#6   | 166.5(6) |
| O(5)#7-Na(3)-O(4)#6 | 89.6(8)  |
| O(5)#3-Na(3)-O(4)#5 | 166.5(6) |
| O(5)#2-Na(3)-O(4)#5 | 95.6(7)  |
| O(5)#5-Na(3)-O(4)#5 | 13.5(6)  |
| O(5)#6-Na(3)-O(4)#5 | 89.6(8)  |
| O(5)-Na(3)-O(4)#5   | 90.4(8)  |
| O(5)#7-Na(3)-O(4)#5 | 84.4(7)  |
| O(4)#6-Na(3)-O(4)#5 | 77.0(7)  |
| O(5)#3-Na(3)-O(4)#7 | 90.4(8)  |
| O(5)#2-Na(3)-O(4)#7 | 166.5(6) |
| O(5)#5-Na(3)-O(4)#7 | 89.6(8)  |
| O(5)#6-Na(3)-O(4)#7 | 84.4(7)  |
| O(5)-Na(3)-O(4)#7   | 95.6(7)  |
| O(5)#7-Na(3)-O(4)#7 | 13.5(6)  |
| O(4)#6-Na(3)-O(4)#7 | 77.0(7)  |
| O(4)#5-Na(3)-O(4)#7 | 77.0(7)  |
| O(5)#3-Na(3)-O(4)#3 | 13.5(6)  |
| O(5)#2-Na(3)-O(4)#3 | 84.4(7)  |
| O(5)#5-Na(3)-O(4)#3 | 166.5(6) |
| O(5)#6-Na(3)-O(4)#3 | 90.4(8)  |
| O(5)-Na(3)-O(4)#3   | 89.6(8)  |
| O(5)#7-Na(3)-O(4)#3 | 95.6(7)  |
| O(4)#6-Na(3)-O(4)#3 | 103.0(7) |
| O(4)#5-Na(3)-O(4)#3 | 180.0(7) |
| O(4)#7-Na(3)-O(4)#3 | 103.0(7) |
| O(5)#3-Na(3)-O(4)   | 84.4(7)  |

|                     |            |
|---------------------|------------|
| O(5)#2-Na(3)-O(4)   | 89.6(8)    |
| O(5)#5-Na(3)-O(4)   | 95.6(7)    |
| O(5)#6-Na(3)-O(4)   | 166.5(6)   |
| O(5)-Na(3)-O(4)     | 13.5(6)    |
| O(5)#7-Na(3)-O(4)   | 90.4(8)    |
| O(4)#6-Na(3)-O(4)   | 180.0(7)   |
| O(4)#5-Na(3)-O(4)   | 103.0(7)   |
| O(4)#7-Na(3)-O(4)   | 103.0(7)   |
| O(4)#3-Na(3)-O(4)   | 77.0(7)    |
| O(5)#3-Na(3)-O(4)#2 | 89.6(8)    |
| O(5)#2-Na(3)-O(4)#2 | 13.5(6)    |
| O(5)#5-Na(3)-O(4)#2 | 90.4(8)    |
| O(5)#6-Na(3)-O(4)#2 | 95.6(7)    |
| O(5)-Na(3)-O(4)#2   | 84.4(7)    |
| O(5)#7-Na(3)-O(4)#2 | 166.5(6)   |
| O(4)#6-Na(3)-O(4)#2 | 103.0(7)   |
| O(4)#5-Na(3)-O(4)#2 | 103.0(7)   |
| O(4)#7-Na(3)-O(4)#2 | 180.000(2) |
| O(4)#3-Na(3)-O(4)#2 | 77.0(7)    |
| O(4)-Na(3)-O(4)#2   | 77.0(7)    |
| O(1)-S(1)-C(1)      | 106.02(17) |
| O(1)-S(1)-C(1)#4    | 106.02(17) |
| C(1)-S(1)-C(1)#4    | 98.2(3)    |
| O(2)-S(2)-C(2)      | 106.32(19) |
| O(2)-S(2)-C(3)      | 106.49(17) |
| C(2)-S(2)-C(3)      | 98.1(2)    |
| O(4)-S(3)-O(3)      | 17.5(8)    |
| O(4)-S(3)-O(5)      | 22.7(9)    |
| O(3)-S(3)-O(5)      | 34.5(8)    |
| O(4)-S(3)-C(5)      | 104.7(8)   |
| O(3)-S(3)-C(5)      | 109.9(2)   |
| O(5)-S(3)-C(5)      | 82.3(8)    |
| O(4)-S(3)-C(4)      | 117.6(9)   |
| O(3)-S(3)-C(4)      | 100.1(2)   |
| O(5)-S(3)-C(4)      | 125.5(8)   |
| C(5)-S(3)-C(4)      | 98.2(3)    |
| O(4)-S(3)-Na(2)     | 38.0(8)    |
| O(3)-S(3)-Na(2)     | 38.44(18)  |
| O(5)-S(3)-Na(2)     | 59.8(8)    |

|                    |            |
|--------------------|------------|
| C(5)-S(3)-Na(2)    | 141.83(17) |
| C(4)-S(3)-Na(2)    | 107.07(18) |
| S(1)-O(1)-Na(1)    | 119.34(14) |
| S(1)-O(1)-Na(1)#4  | 119.34(14) |
| Na(1)-O(1)-Na(1)#4 | 83.68(12)  |
| S(2)-O(2)-Na(1)    | 120.84(15) |
| S(2)-O(2)-Na(2)    | 114.15(15) |
| Na(1)-O(2)-Na(2)   | 82.46(9)   |
| O(5)-O(3)-S(3)     | 75.4(13)   |
| O(5)-O(3)-Na(2)    | 117.6(14)  |
| S(3)-O(3)-Na(2)    | 117.5(3)   |
| O(5)-O(3)-Na(3)    | 41.9(13)   |
| S(3)-O(3)-Na(3)    | 95.8(2)    |
| Na(2)-O(3)-Na(3)   | 75.76(14)  |
| O(5)-O(4)-S(3)     | 92(3)      |
| O(5)-O(4)-Na(2)    | 144(3)     |
| S(3)-O(4)-Na(2)    | 120.0(11)  |
| O(5)-O(4)-Na(3)    | 64(3)      |
| S(3)-O(4)-Na(3)    | 117.9(11)  |
| Na(2)-O(4)-Na(3)   | 83.7(6)    |
| O(4)-O(5)-O(3)     | 26(2)      |
| O(4)-O(5)-S(3)     | 66(3)      |
| O(3)-O(5)-S(3)     | 70.0(12)   |
| O(4)-O(5)-Na(3)    | 102(3)     |
| O(3)-O(5)-Na(3)    | 122.9(17)  |
| S(3)-O(5)-Na(3)    | 122.5(12)  |
| O(4)-O(5)-Na(2)    | 29(3)      |
| O(3)-O(5)-Na(2)    | 45.9(11)   |
| S(3)-O(5)-Na(2)    | 91.9(9)    |
| Na(3)-O(5)-Na(2)   | 77.0(6)    |

---

Symmetry transformations used to generate equivalent atoms:

#1 x,y,-z-1/2 #2 -x+y-1,-x+1,z #3 -y+1,x-y+2,z

#4 x,y,-z+1/2 #5 y-1,-x+y,-z #6 -x,-y+2,-z

#7 x-y+1,x+1,-z

**Table 4.** Anisotropic displacement parameters ( $\text{\AA}^2 \times 10^3$ ) for **1**. The anisotropic displacement factor exponent takes the form:  $2\pi^2 [h^2 a^{*2} U^{11} + \dots + 2 h k a^* b^* U^{12}]$

|       | U <sup>11</sup> | U <sup>22</sup> | U <sup>33</sup> | U <sup>23</sup> | U <sup>13</sup> | U <sup>12</sup> |
|-------|-----------------|-----------------|-----------------|-----------------|-----------------|-----------------|
| I(1)  | 45(1)           | 45(1)           | 56(1)           | 0               | 0               | 22(1)           |
| I(2)  | 42(1)           | 42(1)           | 49(1)           | 0               | 0               | 21(1)           |
| I(3)  | 38(1)           | 38(1)           | 53(1)           | 0               | 0               | 19(1)           |
| I(4)  | 53(1)           | 53(1)           | 43(1)           | 0               | 0               | 26(1)           |
| I(5)  | 48(1)           | 48(1)           | 42(1)           | 0               | 0               | 24(1)           |
| I(6)  | 35(1)           | 35(1)           | 52(1)           | 0               | 0               | 17(1)           |
| Na(1) | 33(1)           | 33(1)           | 32(1)           | 0               | 0               | 16(1)           |
| Na(2) | 32(1)           | 32(1)           | 32(1)           | 0               | 0               | 16(1)           |
| Na(3) | 44(5)           | 44(5)           | 48(6)           | 0               | 0               | 22(2)           |
| S(1)  | 33(1)           | 31(1)           | 38(1)           | 0               | 0               | 16(1)           |
| S(2)  | 35(1)           | 31(1)           | 42(1)           | -2(1)           | -3(1)           | 16(1)           |
| S(3)  | 47(1)           | 37(1)           | 61(1)           | -4(1)           | -3(1)           | 24(1)           |
| O(1)  | 29(2)           | 45(2)           | 40(2)           | 0               | 0               | 17(2)           |
| O(2)  | 53(2)           | 41(2)           | 55(2)           | -10(1)          | -7(1)           | 32(2)           |
| C(1)  | 37(3)           | 55(3)           | 46(2)           | -7(2)           | 7(2)            | 17(2)           |
| C(2)  | 62(3)           | 68(3)           | 45(2)           | 11(2)           | 6(2)            | 44(3)           |
| C(3)  | 60(3)           | 60(3)           | 41(2)           | -13(2)          | -8(2)           | 38(2)           |
| C(4)  | 77(4)           | 62(3)           | 46(2)           | 8(2)            | -8(2)           | 25(3)           |
| C(5)  | 81(4)           | 59(3)           | 42(2)           | -9(2)           | 3(2)            | 23(3)           |

**Table 5.** Hydrogen coordinates ( $\times 10^4$ ) and isotropic displacement parameters ( $\text{\AA}^2 \times 10^3$ ) for **1**.

|       | x    | y     | z    | U(eq) |
|-------|------|-------|------|-------|
| H(1A) | 3141 | 10285 | 1838 | 74    |
| H(1B) | 3053 | 9160  | 2111 | 74    |
| H(1C) | 4324 | 10519 | 2110 | 74    |
| H(2A) | 476  | 7225  | 2168 | 80    |
| H(2B) | 691  | 6284  | 1885 | 80    |
| H(2C) | -692 | 6131  | 1923 | 80    |
| H(3A) | 134  | 7086  | 848  | 75    |
| H(3B) | -892 | 6047  | 1146 | 75    |
| H(3C) | 491  | 6202  | 1108 | 75    |
| H(4A) | 3424 | 10391 | 1172 | 99    |
| H(4B) | 4505 | 10710 | 845  | 99    |
| H(4C) | 3360 | 9283  | 896  | 99    |
| H(5A) | 2809 | 10123 | -131 | 99    |
| H(5B) | 3032 | 9148  | 131  | 99    |
| H(5C) | 4154 | 10586 | 79   | 99    |

## References

- (1) Kuhn, R. *Angew. Chem.* **1957**, *17*, 570.
- (2) Kuhn R.; Trischmann, H. *Liebigs Ann.* **1958**, *611*, 117.
- (3) Knop, O.; Linden, A.; Vincent, B. R.; Choi, S. C.; Cameron, S. T.; Boyd, R. *J. Can. J. Chem.* **1989**, *67*, 1984.
- (4) Smith, S. G.; Winstein, S.; *Tetrahedron.* **1958**, *3*, 317-319.
- (5) Z. Otwinowski, W. Minor, *Methods in Enzymology*, **1997**, *276*, 307-326, Academic Press, New York, 1997.
- (6) G.M. Sheldrick, Program package SHELXTL V.5.1, Bruker Analytical X-Ray Instruments Inc, Madison, USA (1997).
